# Supplementary material
Source: publisher site journal article supplement (https://www.dovepress.com/article/345681)
Supplement: Supplementary file 1 [file get_supplementary_file.php]

# 1 **Supplementary Figure Legends**

2 **Supplementary Figure 1.** Histogram of nuclear area of mononuclear hepatocytes for one HCC  
3 patient (A). The shape of the histogram shows a clear trimodal distribution (peaks), which are  
4 positioned proportionally. The first, second and third peaks are representative of diploid, tetraploid  
5 and octoploid nucleus, respectively (nuclear ploidy). Nuclei with area < 200 or > 4000 pixel<sup>2</sup> were  
6 excluded from analysis (non-hepatocytes population and incorrect DAPI segmentation).

7 Immunohistochemistry analysis of positive (left panel) and negative (right panel) PD-L1 expressions on  
8 tumoral cells (B) and immune stroma (C). Upper panel, 200× magnification, scale bar = 200 μm;  
9 lower panel, 400× magnification, scale bar = 50 μm. PD-L1 showed a membrane staining. PD-L1,  
10 programmed death-ligand 1.

11 **Supplementary Figure 2.** Recurrence-free survival and HCC-specific survival stratified by the  
12 Milan criteria (A), AFP model (B) and Metroticket 2.0 criteria (C), and compared using the log-rank  
13 test in the derivation cohort. HCC, hepatocellular carcinoma. HMP–HCC, highly mononuclear  
14 polyploid hepatocellular carcinoma; PMP–HCC, poorly mononuclear polyploid hepatocellular  
15 carcinoma.

16 **Supplementary Figure 3.** Recurrence-free survival and HCC-specific survival according to the  
17 Milan criteria (A), AFP model (B), and Metroticket 2.0 criteria (C) in the validation cohort, and  
18 compared using the log-rank test. HCC, hepatocellular carcinoma. HMP–HCC, highly mononuclear  
19 polyploid hepatocellular carcinoma; PMP–HCC, poorly mononuclear polyploid hepatocellular  
20 carcinoma.

21 **Supplementary Figure 4.** HCC-specific survival curves according to the ploidy distribution (A), and  
22 the Milan criteria (B), AFP model (C), and Metroticket 2.0 criteria (D) in the derivation set. HCC,  
23 hepatocellular carcinoma. HMP–HCC, highly mononuclear polyploid hepatocellular carcinoma;  
24 PMP–HCC, poorly mononuclear polyploid hepatocellular carcinoma.

25 **Supplementary Figure 5.** Distributions of density of FoxP3<sup>+</sup> Treg cells (A) and CD8<sup>+</sup> cytotoxic T  
26 cells (B) between HMP–HCC and PMP–HCC. Similar distribution of density of CD4<sup>+</sup> Th cells

27 between HMP–HCC and PMP–HCC (C). No significant correlation between density of CD4<sup>+</sup> Th  
28 cells and the fraction of mononuclear polyploidy (D). FoxP3, forkhead box P3; HMP–HCC, highly  
29 mononuclear polyploid hepatocellular carcinoma; PMP–HCC, poorly mononuclear polyploid  
30 hepatocellular carcinoma.

31 **Supplementary Figure 6.** Recurrence-free survival stratified according to the ploidy distribution (A),  
32 and with the combinations of the Milan criteria (B), AFP model (C), and Metroticket 2.0 criteria (D) in  
33 the validation set. HCC, hepatocellular carcinoma. HMP–HCC, highly mononuclear polyploid  
34 hepatocellular carcinoma; PMP–HCC, poorly mononuclear polyploid hepatocellular carcinoma.

35 **Supplementary Figure 7.** HCC-specific survival according to the ploidy distribution (A), and with  
36 the combinations of the Milan criteria (B), AFP model (C), and Metroticket 2.0 criteria (D) in the  
37 validation set. HCC, hepatocellular carcinoma. HMP–HCC, highly mononuclear polyploid  
38 hepatocellular carcinoma; PMP–HCC, poorly mononuclear polyploid hepatocellular carcinoma.

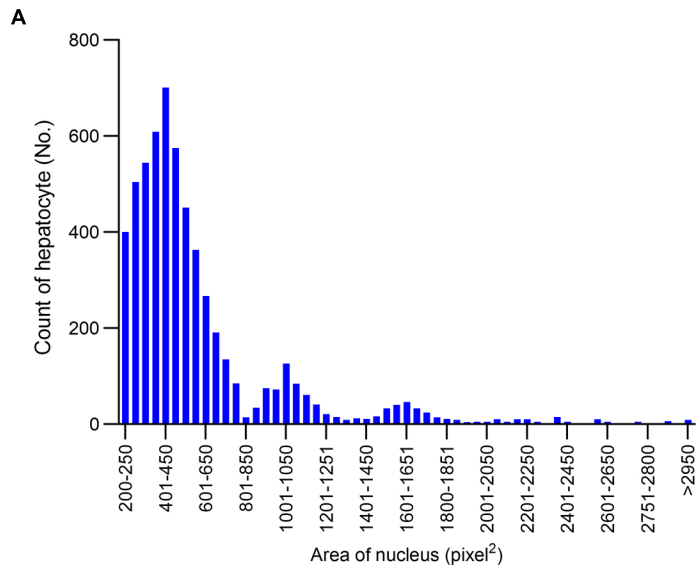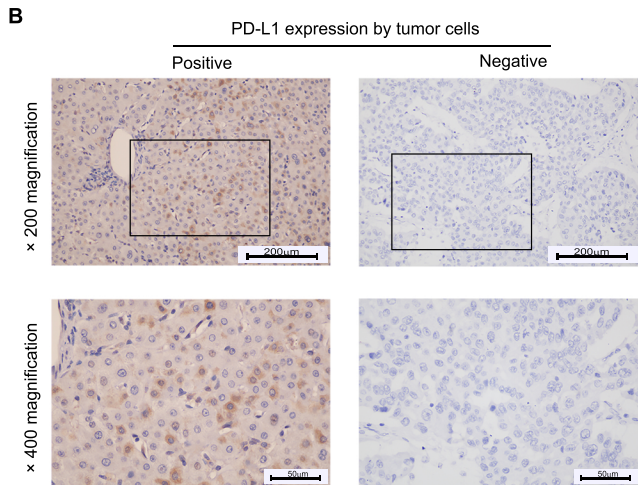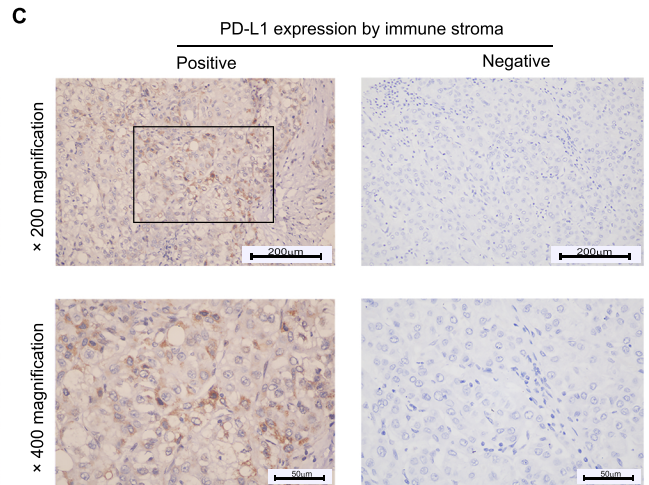

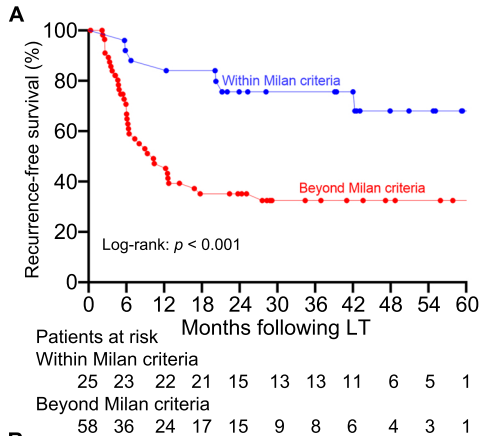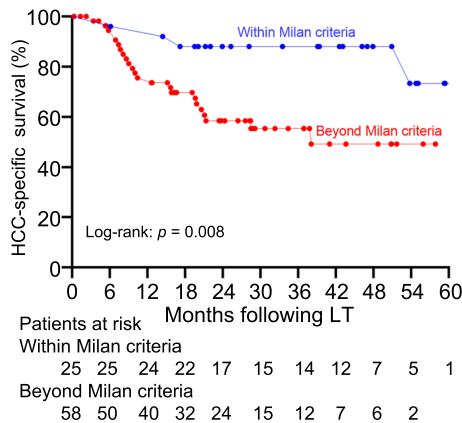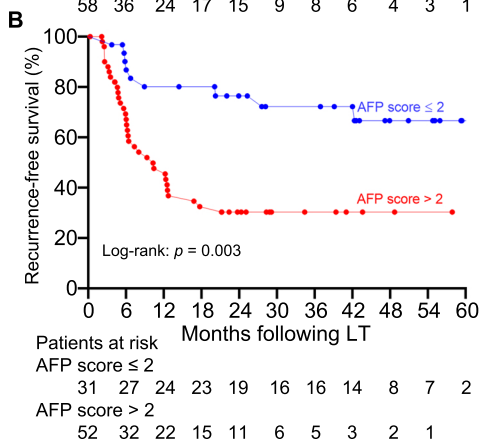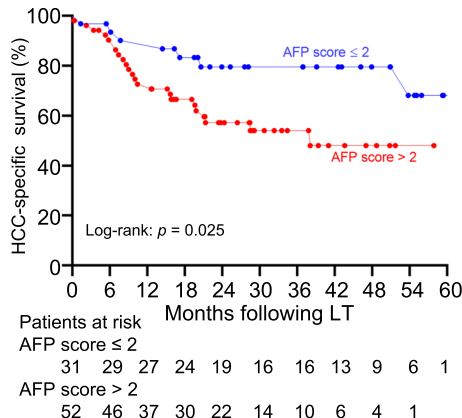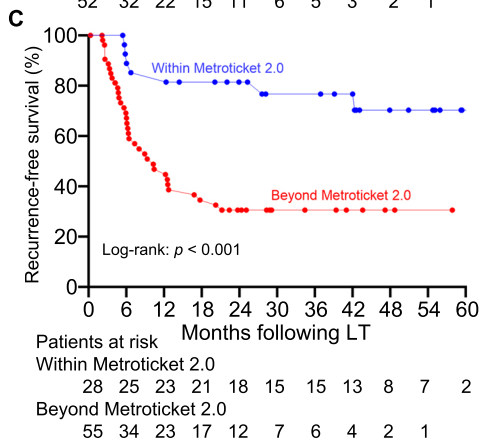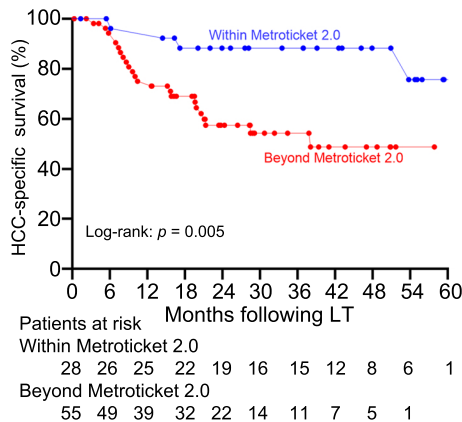

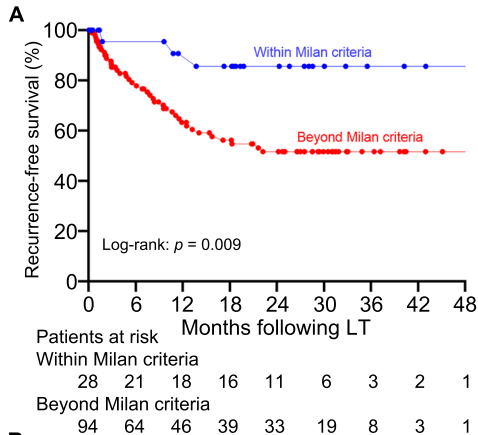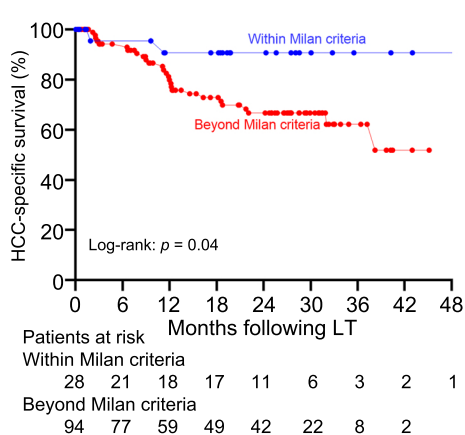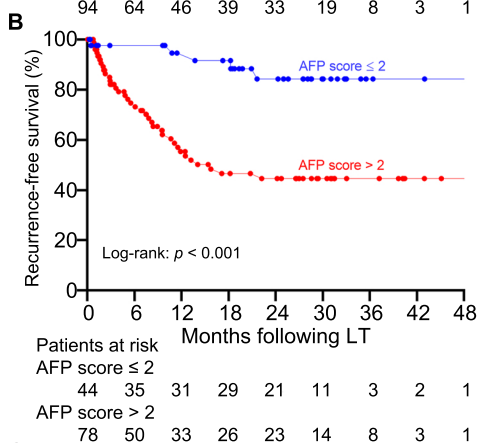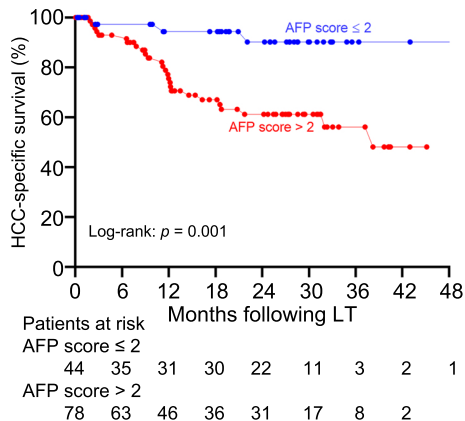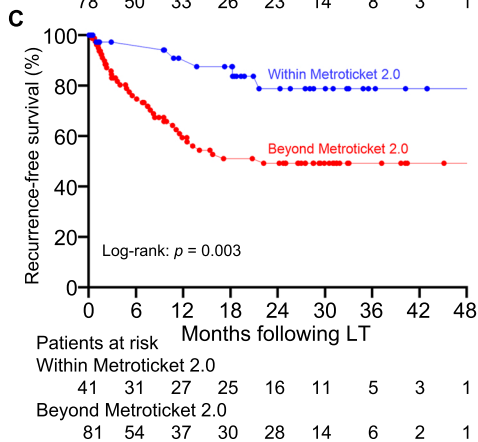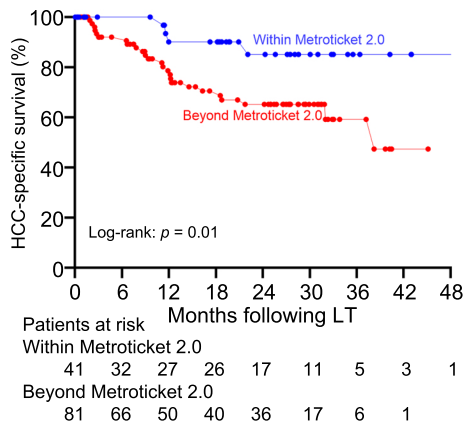

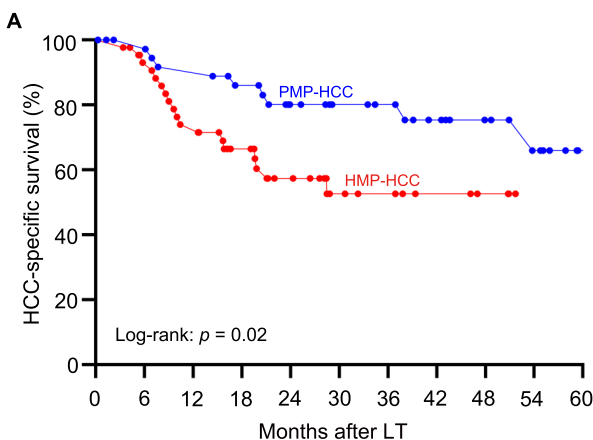

Patients at risk

|         |    |    |    |    |    |    |    |    |    |   |   |
|---------|----|----|----|----|----|----|----|----|----|---|---|
| PMP-HCC | 39 | 36 | 33 | 30 | 24 | 20 | 18 | 14 | 10 | 7 | 1 |
| HMP-HCC | 44 | 39 | 31 | 24 | 17 | 10 | 8  | 5  | 3  |   |   |

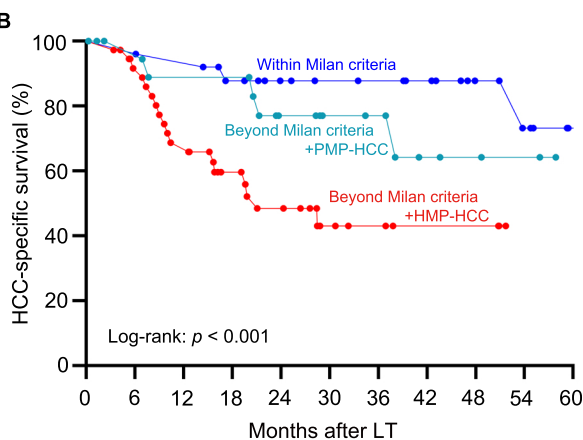

Patients at risk

|                                 |    |    |    |    |    |    |    |    |   |   |   |
|---------------------------------|----|----|----|----|----|----|----|----|---|---|---|
| Within Milan criteria           | 25 | 25 | 24 | 21 | 17 | 15 | 14 | 12 | 7 | 5 | 1 |
| Beyond Milan criteria + PMP-HCC | 21 | 18 | 16 | 16 | 11 | 8  | 7  | 4  | 3 | 2 |   |
| Beyond Milan criteria + HMP-HCC | 37 | 32 | 24 | 17 | 13 | 7  | 5  | 3  | 3 |   |   |

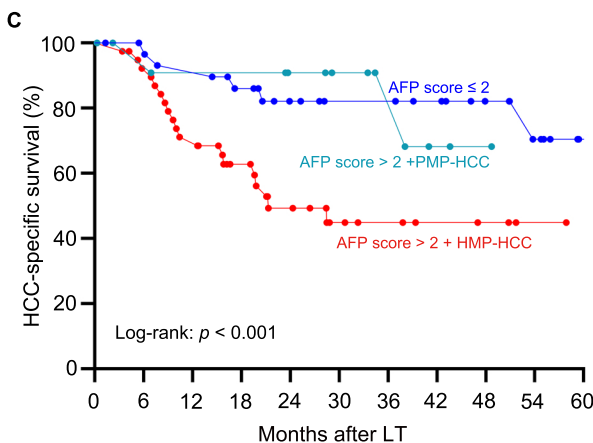

Patients at risk

|                                 |    |    |    |    |    |    |    |    |   |   |   |
|---------------------------------|----|----|----|----|----|----|----|----|---|---|---|
| AFP score $\leq 2$              | 31 | 29 | 27 | 24 | 19 | 16 | 16 | 13 | 9 | 6 | 1 |
| AFP score $> 2$ + PMP-HCC       | 13 | 11 | 10 | 10 | 8  | 6  | 4  | 2  | 1 |   |   |
| Beyond Milan criteria + HMP-HCC | 39 | 35 | 27 | 20 | 14 | 8  | 6  | 4  | 3 | 1 |   |

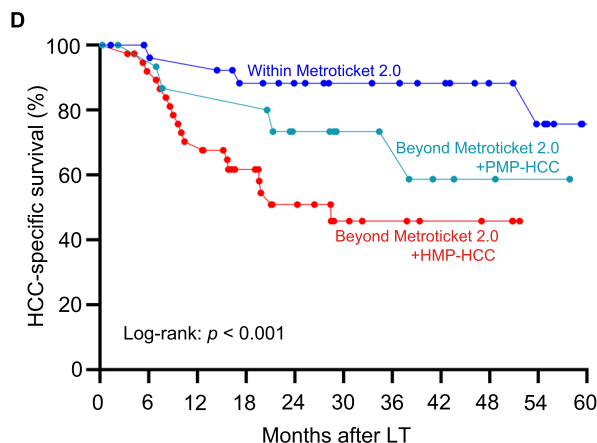

Patients at risk

|                                  |    |    |    |    |    |    |    |    |   |   |   |
|----------------------------------|----|----|----|----|----|----|----|----|---|---|---|
| Within Metroticket 2.0           | 28 | 26 | 25 | 22 | 19 | 16 | 15 | 12 | 8 | 6 | 1 |
| Beyond Metroticket 2.0 + PMP-HCC | 17 | 15 | 13 | 13 | 9  | 6  | 5  | 3  | 2 | 1 |   |
| Beyond Metroticket 2.0 + HMP-HCC | 38 | 34 | 26 | 19 | 13 | 8  | 6  | 4  | 3 |   |   |

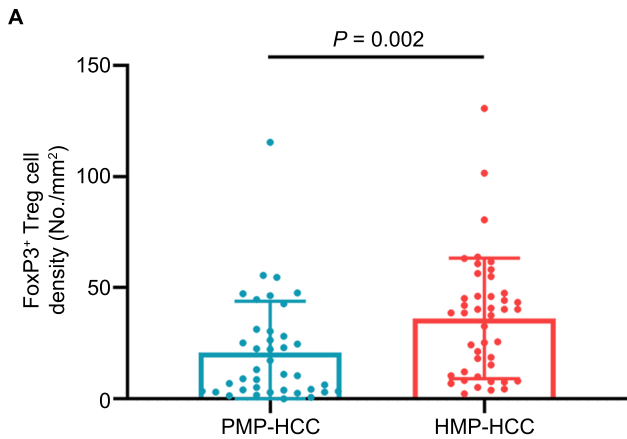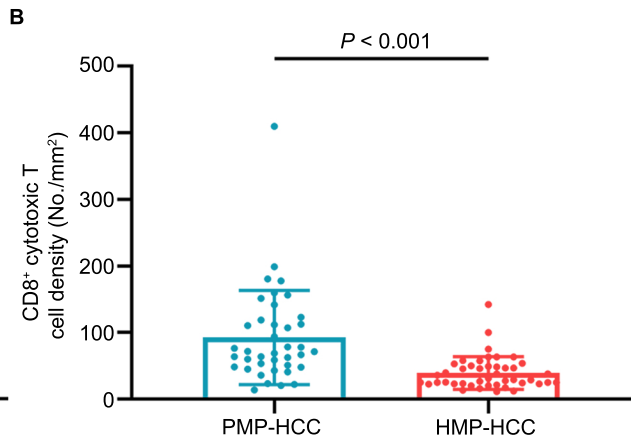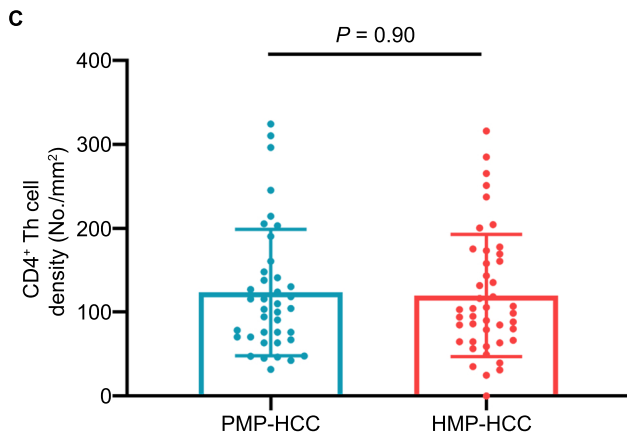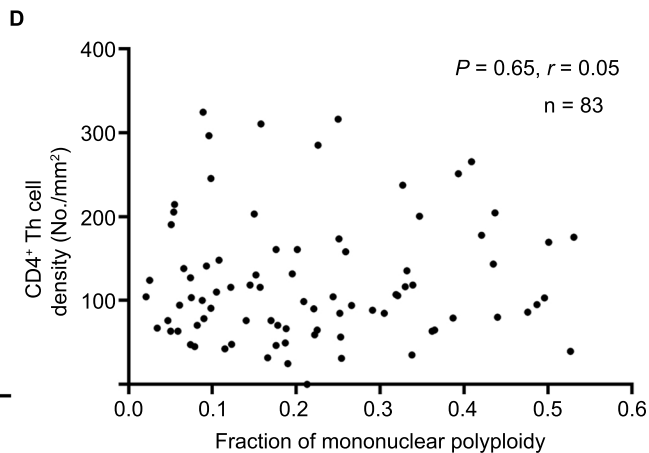

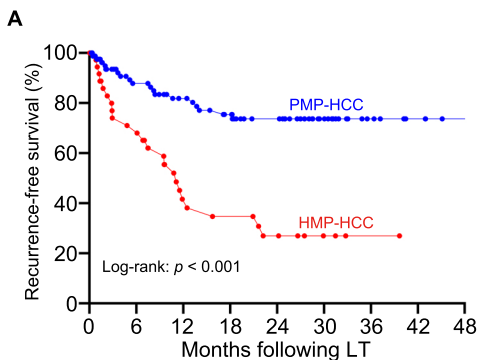

Patients at risk

|         |    |    |    |    |    |    |    |   |   |
|---------|----|----|----|----|----|----|----|---|---|
| PMP-HCC | 85 | 61 | 52 | 45 | 37 | 22 | 10 | 5 | 2 |
| HMP-HCC | 37 | 24 | 12 | 10 | 7  | 3  | 1  |   |   |

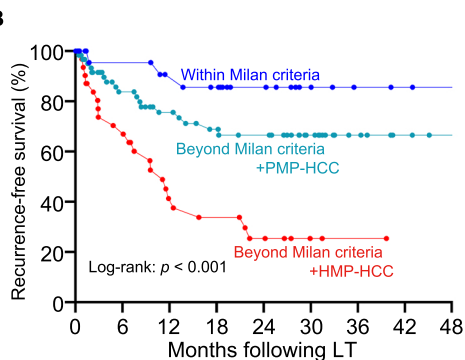

Patients at risk

|                                 |    |    |    |    |    |    |   |   |   |
|---------------------------------|----|----|----|----|----|----|---|---|---|
| Within Milan criteria           | 28 | 21 | 18 | 16 | 11 | 6  | 3 | 2 | 1 |
| Beyond Milan criteria + PMP-HCC | 63 | 43 | 35 | 30 | 27 | 17 | 7 | 3 | 1 |
| Beyond Milan criteria + HMP-HCC | 31 | 21 | 11 | 9  | 6  | 2  | 1 |   |   |

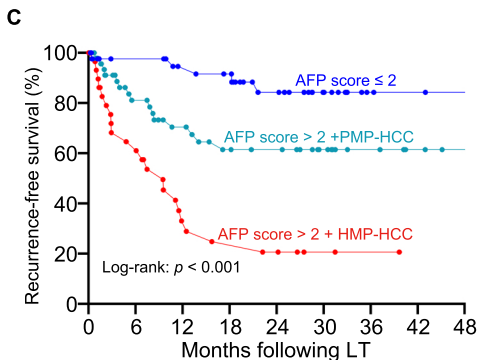

Patients at risk

|                           |    |    |    |    |    |    |   |   |   |
|---------------------------|----|----|----|----|----|----|---|---|---|
| AFP score $\leq 2$        | 44 | 35 | 31 | 29 | 21 | 11 | 3 | 2 | 1 |
| AFP score $> 2$ + PMP-HCC | 48 | 32 | 25 | 20 | 18 | 12 | 7 | 3 | 1 |
| AFP score $> 2$ + HMP-HCC | 30 | 18 | 8  | 6  | 5  | 2  | 1 |   |   |

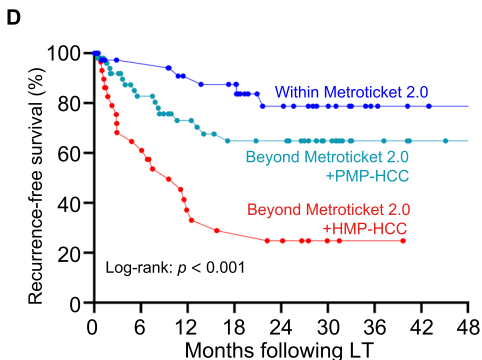

Patients at risk

|                                  |    |    |    |    |    |    |   |   |   |
|----------------------------------|----|----|----|----|----|----|---|---|---|
| Within Metroticket 2.0           | 41 | 31 | 27 | 25 | 16 | 11 | 5 | 3 | 1 |
| Beyond Metroticket 2.0 + PMP-HCC | 52 | 36 | 28 | 23 | 22 | 12 | 5 | 2 | 1 |
| Beyond Metroticket 2.0 + HMP-HCC | 29 | 18 | 9  | 7  | 6  | 2  | 1 |   |   |



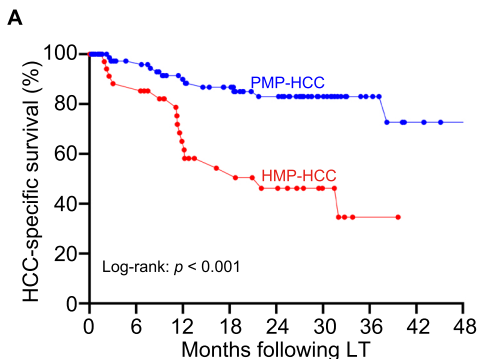

Patients at risk

|         |    |    |    |    |    |    |    |   |   |
|---------|----|----|----|----|----|----|----|---|---|
| PMP-HCC | 85 | 68 | 58 | 52 | 42 | 23 | 10 | 4 | 1 |
| HMP-HCC | 37 | 30 | 19 | 14 | 11 | 5  | 1  |   |   |

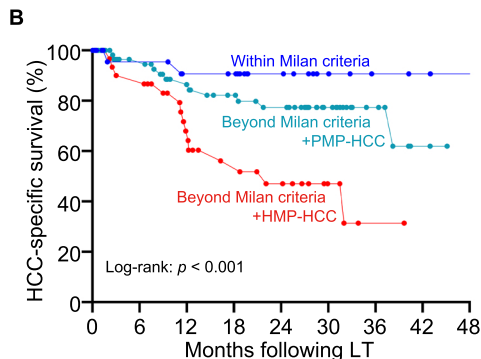

Patients at risk

|                                 |    |    |    |    |    |    |   |   |   |
|---------------------------------|----|----|----|----|----|----|---|---|---|
| Within Milan criteria           | 28 | 21 | 18 | 17 | 11 | 6  | 3 | 2 | 1 |
| Beyond Milan criteria + PMP-HCC | 63 | 50 | 41 | 36 | 32 | 18 | 7 | 2 |   |
| Beyond Milan criteria + HMP-HCC | 31 | 27 | 18 | 13 | 10 | 4  | 1 |   |   |

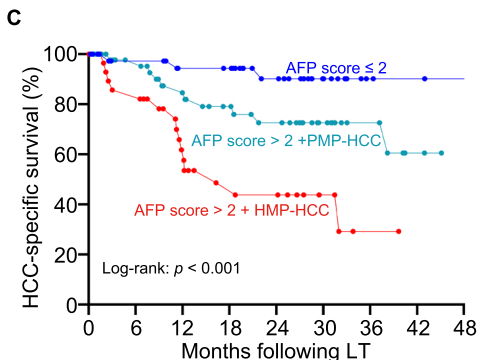

Patients at risk

|                           |    |    |    |    |    |    |   |   |   |
|---------------------------|----|----|----|----|----|----|---|---|---|
| AFP score $\leq 2$        | 44 | 35 | 31 | 30 | 22 | 11 | 3 | 2 | 1 |
| AFP score $> 2$ + PMP-HCC | 48 | 39 | 31 | 26 | 22 | 13 | 7 | 2 |   |
| AFP score $> 2$ + HMP-HCC | 30 | 24 | 15 | 10 | 9  | 4  | 1 |   |   |

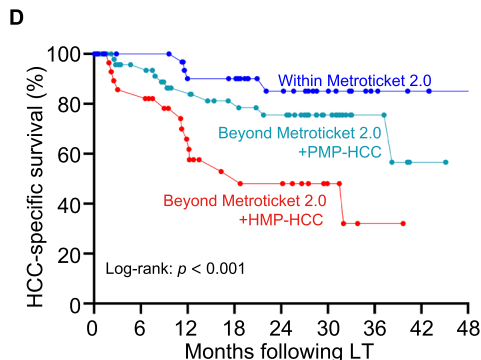

Patients at risk

|                                  |    |    |    |    |    |    |   |   |   |
|----------------------------------|----|----|----|----|----|----|---|---|---|
| Within Metroticket 2.0           | 41 | 32 | 27 | 26 | 17 | 11 | 5 | 3 | 1 |
| Beyond Metroticket 2.0 + PMP-HCC | 52 | 42 | 34 | 29 | 26 | 13 | 5 | 1 |   |
| Beyond Metroticket 2.0 + HMP-HCC | 29 | 24 | 16 | 11 | 10 | 4  | 1 |   |   |
